# Supplementary material for: High‐resolution mapping of the pericentromeric region on wheat chromosome arm 5AS harbouring the Fusarium head blight resistance QTL Qfhs.ifa‐5A
Source: PubMed Central journal article supplement (PMC5902775; doi:10.1111/pbi.12850), 2017-11-10
Supplement: PBI-16-1046-s001.pdf [file PBI-16-1046-s001.pdf]

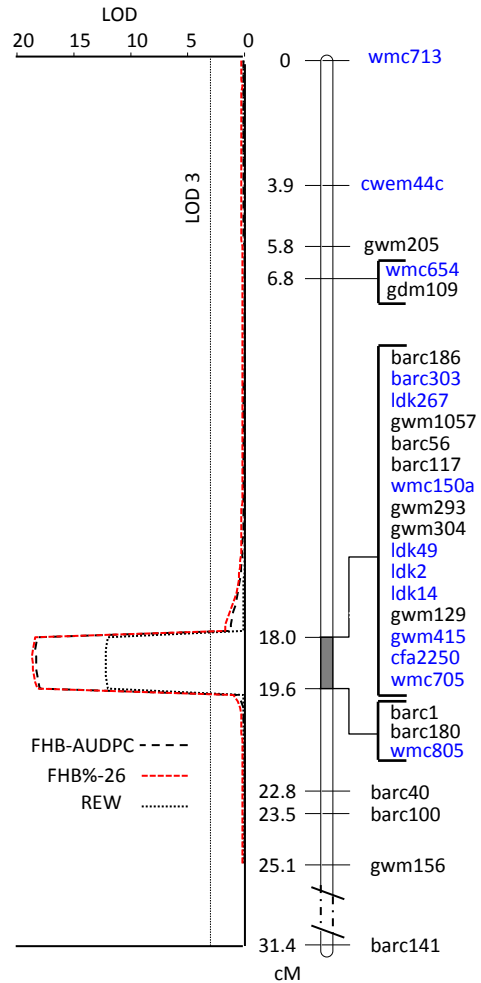

**Figure S1** Refined linkage group of the DH population. New added markers are in blue. LOD curves determined by composite interval mapping for FHB area under the disease progress curve (FHB-AUDPC), percentage of infected spikelets on day 26 (FHB%-26), relative ear weight (REW) are shown on the left. Highlighted grey intervals in chromosome bars refer to the *Qfhs.ifa-5A* support interval. For QTL analysis the same phenotypic data were used as in Buerstmayr et al. (2003)
