# Supplementary material for: High‐resolution mapping of the pericentromeric region on wheat chromosome arm 5AS harbouring the Fusarium head blight resistance QTL Qfhs.ifa‐5A
Source: PubMed Central journal article supplement (PMC5902775; doi:10.1111/pbi.12850), 2017-11-10
Supplement: PBI-16-1046-s002.pdf [file PBI-16-1046-s002.pdf]

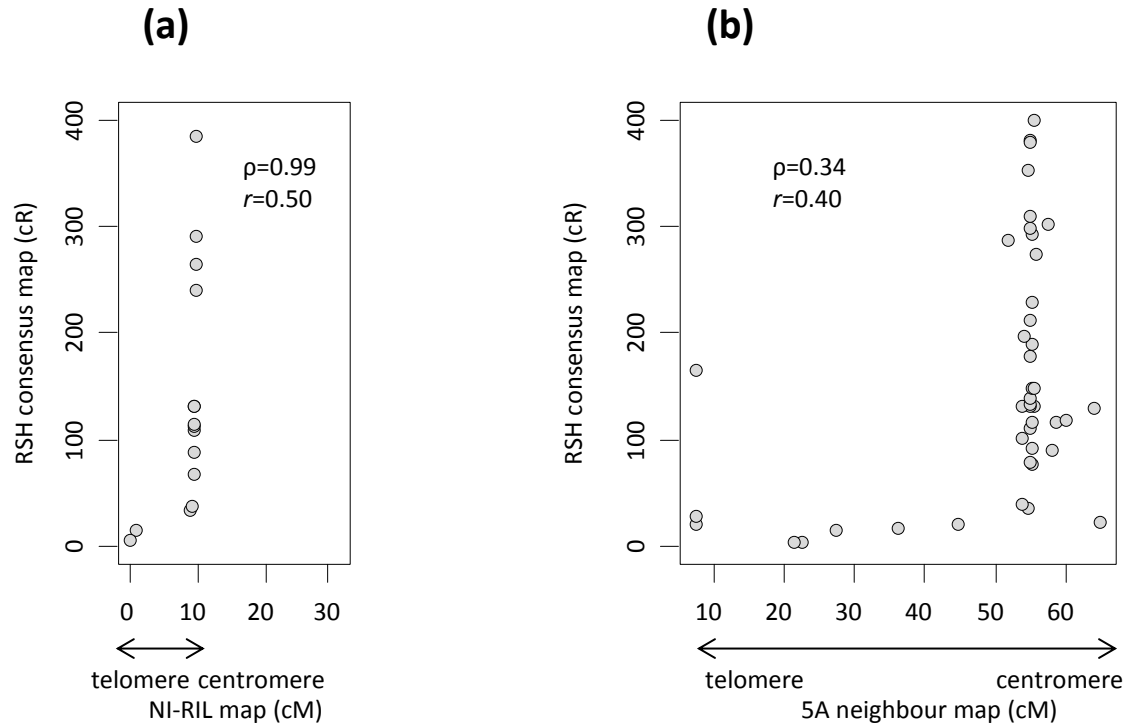

**Figure S2** Scatterplots of marker positions of the RHS-consensus map (cR) against **(a)** the NI-RIL map (cM) and against **(b)** the 5A neighbour map (cM) along the chromosome 5AS. Genetic cM distances of 5A neighbour map are derived from Barabaschi et al. (2015)
