# Supplementary material for: High‐resolution mapping of the pericentromeric region on wheat chromosome arm 5AS harbouring the Fusarium head blight resistance QTL Qfhs.ifa‐5A
Source: PubMed Central journal article supplement (PMC5902775; doi:10.1111/pbi.12850), 2017-11-10
Supplement: PBI-16-1046-s003.pdf [file PBI-16-1046-s003.pdf]

## RS-NIL3 panel

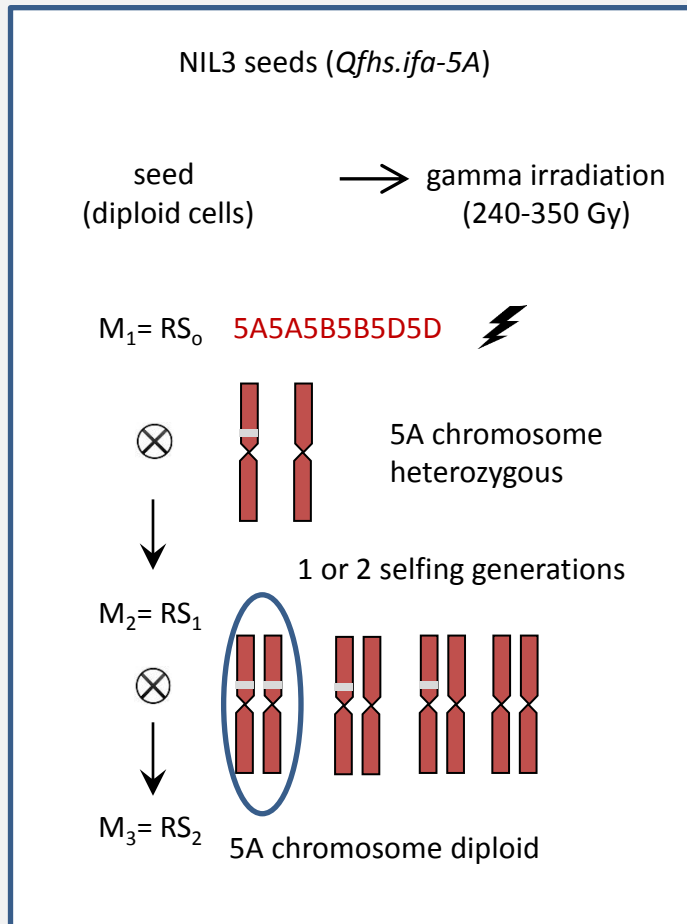

## RH-CS panel

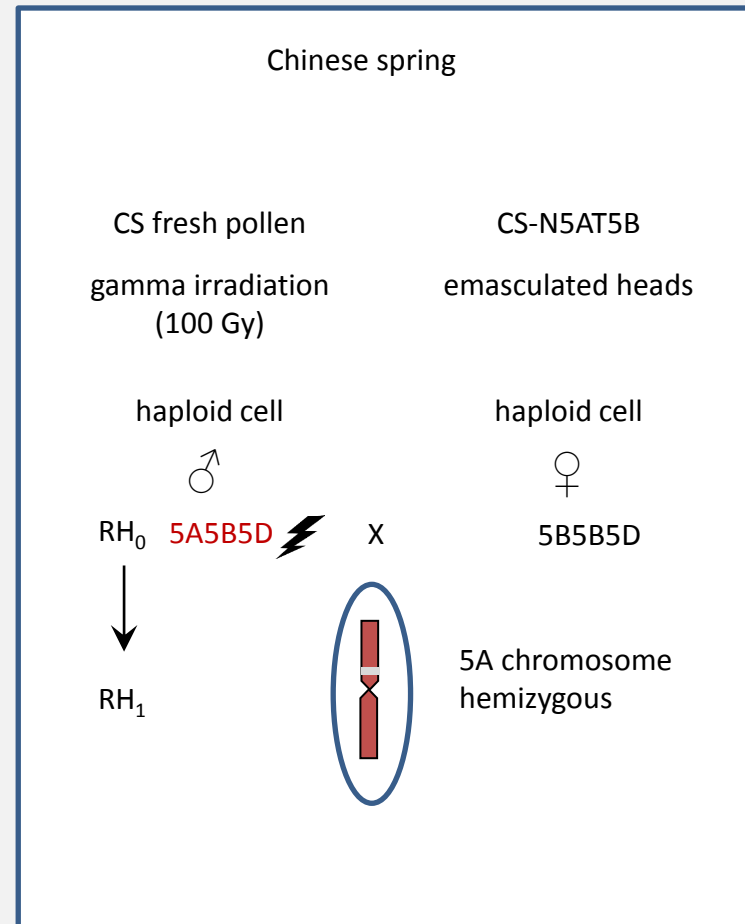

**Figure S3** Development of radiation selfing panel (RS-NIL3) and radiation hybrid panel (RH-CS). Development of RS-NIL3 panel involved seed irradiation ( $M_1 = RS_0$ ) following 1 or 2 generations of selfing ( $M_2 = RS_1$ ,  $M_3 = RS_2$ ) to obtain homozygote deletions. RH-CS panel was developed by pollinating Chinese Spring Nulli5ATetra5B (CS-N5AT5B) with irradiated pollen from Chinese Spring ( $RH_0$ ) to obtain  $RH_1$  plants.  $RH_1$  plants have the 5A chromosome in hemizygous state and potential deletions on chromosome 5A are directly detectable.
